# Supplementary material for: What can electrospray mass spectrometry of paratungstates in an equilibrating mixture tell us?
Source: Royal Society of Chemistry journal article supplement (doi:10.1039/c5ra18059g), 2015-01-01
Supplement: c5ra18059g1.pdf [file c5ra18059g1.pdf]

**What Can Electrospray Mass Spectrometry of Paratungstates in An  
Equilibrating Mixture Tell us?**

Linyuan Fan, Jie Cao\* and Changwen Hu\*

Key Laboratory of Cluster Science, Ministry of Education of China; Beijing Key  
Laboratory of Photoelectronic/Electrophotonic Conversion Materials; School of  
Chemistry, Beijing Institute of Technology, Beijing 100081, P.R. China

\*Corresponding authors. E-mail: [jcao@bit.edu.cn](mailto:jcao@bit.edu.cn); [cwhu@bit.edu.cn](mailto:cwhu@bit.edu.cn). Tel./fax number:  
0086-10-68912631.

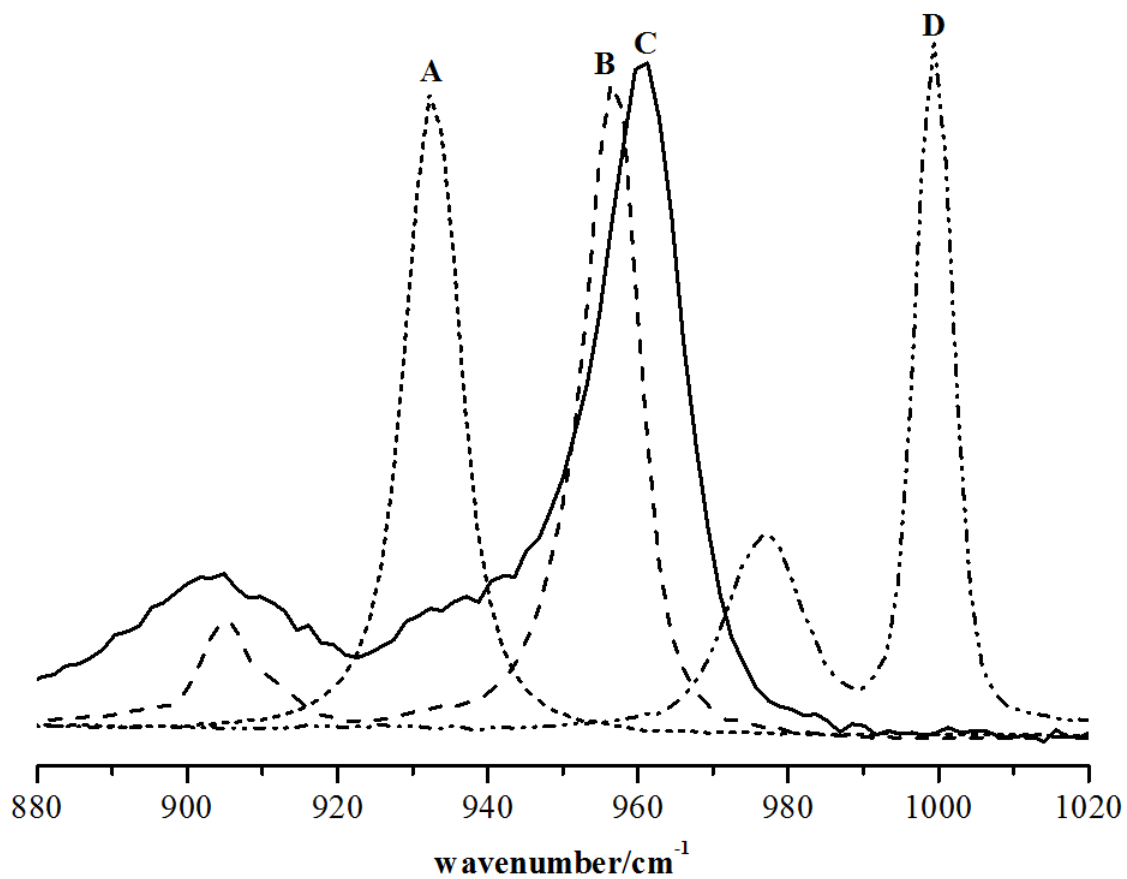

**Fig. S1** Raman spectra of (A)  $\text{Na}_2\text{WO}_4$  solution with unadjusted pH; (B)  $\text{Na}[\text{Cu}(\text{en})_2]_2[\text{HW}_7\text{O}_{24}]$  (solid); (C)  $\text{Na}_2\text{WO}_4$  solution at pH 6.8 (equilibrating time = 4 h) and (D)  $\text{TBA}_2\text{W}_6\text{O}_{19}$  (dissolved in DMF).

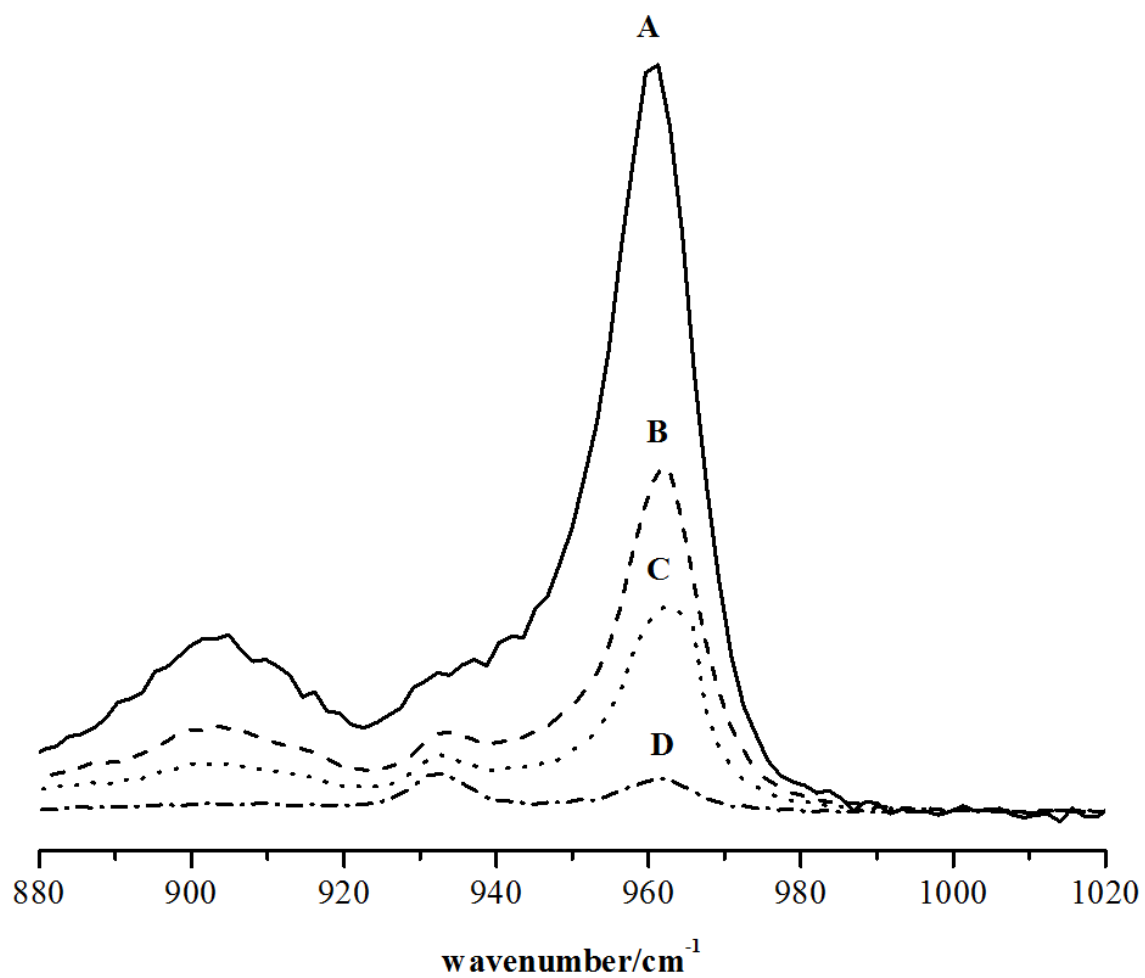

**Fig. S2** Raman spectra of Na<sub>2</sub>WO<sub>4</sub> solution at pH 6.8 as a function of concentration (equilibrating time = 4 h): A, 4 M; B, 1 M; C, 0.5 M; D, 0.1 M.

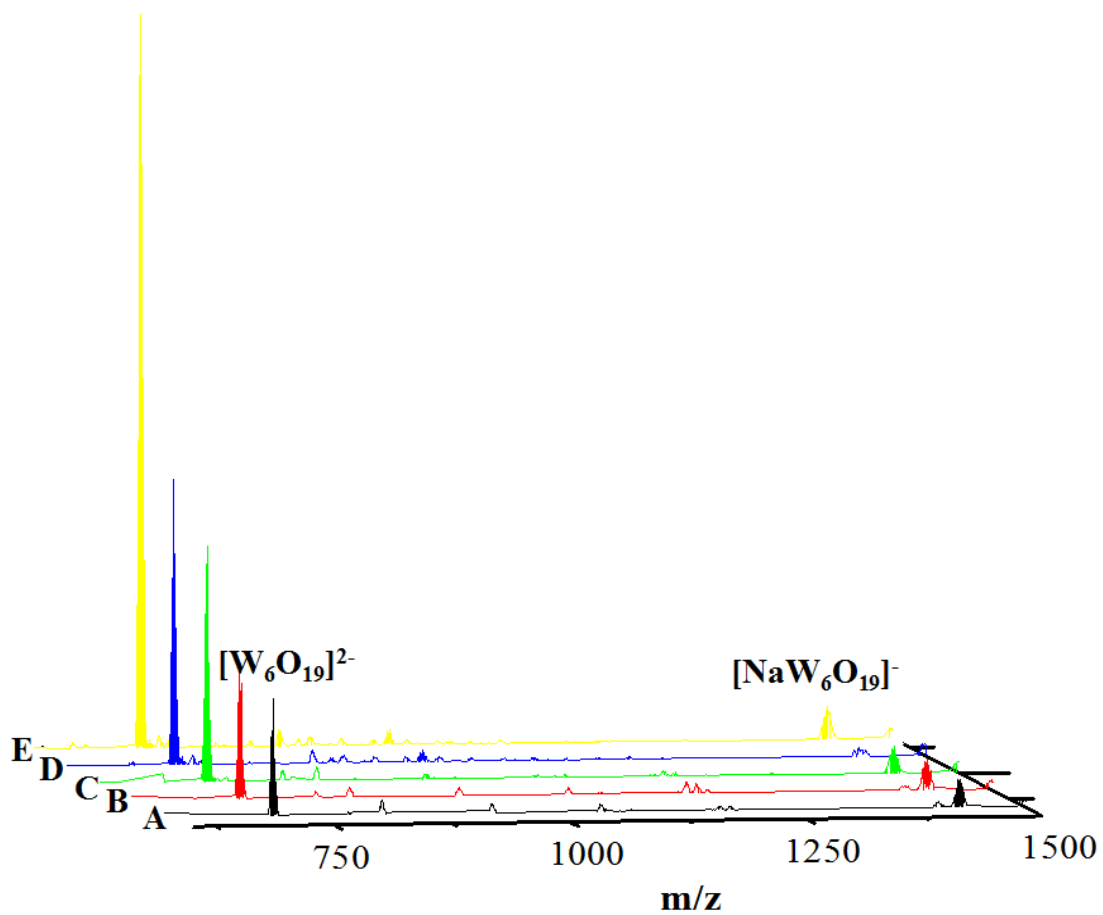

**Fig. S3** A stacked plot of negative-ion ESI mass spectra of  $\text{Na}_2\text{WO}_4$  solution at pH 6.8 as a function of equilibrating times: A, 1 h; B, 2 h; C, 12 h; D, 24 h; E, 48 h.
